# Supplementary material
Source: PubMed Central journal article supplement (PMC8720808)
Supplement: mmc2.pdf [file mmc2.pdf]

| Protein  | UniProt description                                         | Classification | NPX difference | adjust P-value |
|----------|-------------------------------------------------------------|----------------|----------------|----------------|
| SCARB2   | scavenger receptor class B member 2                         | Immune related | 1.08           | 1.5E-21        |
| SIGLEC1  | sialic acid binding Ig like lectin 1                        | Immune related | 1.35           | 1.4E-20        |
| CTSO     | cathepsin O                                                 | Other          | 1.14           | 4.2E-19        |
| CXCL10   | C-X-C motif chemokine ligand 10                             | Cytokine       | 2.72           | 3.1E-18        |
| GRN      | granulin precursor                                          | Cytokine       | 1.12           | 3.8E-18        |
| LAG3     | lymphocyte activating 3                                     | Immune related | 1.08           | 8.3E-18        |
| CCL8     | C-C motif chemokine ligand 8                                | Cytokine       | 2.09           | 3.0E-17        |
| IFNL1    | interferon lambda 1                                         | Cytokine       | 1.95           | 1.0E-16        |
| LAMP3    | lysosomal associated membrane protein 3                     | Immune related | 1.43           | 3.3E-16        |
| CSF1     | colony stimulating factor 1                                 | Cytokine       | 1.00           | 4.3E-15        |
| TCN2     | transcobalamin 2                                            | Other          | 0.99           | 5.4E-15        |
| CLEC6A   | C-type lectin domain containing 6A                          | Immune related | 1.24           | 1.2E-13        |
| ANGPTL1  | angiopoietin like 1                                         | Other          | 0.99           | 4.2E-13        |
| LGALS9   | galectin 9                                                  | Immune related | 0.88           | 4.2E-13        |
| CD300E   | CD300e molecule                                             | Immune related | 1.03           | 6.2E-13        |
| TNFSF10  | TNF superfamily member 10                                   | Cytokine       | 0.71           | 6.2E-13        |
| IL15     | interleukin 15                                              | Cytokine       | 0.85           | 8.1E-13        |
| CD14     | CD14 molecule                                               | Immune related | 1.34           | 3.0E-12        |
| EBI3_IL2 | NA                                                          | Cytokine       | 0.61           | 1.7E-11        |
| CX3CL1   | C-X3-C motif chemokine ligand 1                             | Cytokine       | 0.87           | 3.0E-11        |
| LGMN     | legumain                                                    | Other          | 0.83           | 5.7E-11        |
| CLEC4C   | C-type lectin domain family 4 member C                      | Immune related | 0.89           | 7.1E-11        |
| TINAGL1  | tubulointerstitial nephritis antigen like 1                 | Other          | 0.70           | 9.1E-11        |
| CRLF1    | cytokine receptor like factor 1                             | Cytokine       | 0.74           | 1.0E-10        |
| PTX3     | pentraxin 3                                                 | Immune related | 0.80           | 1.2E-10        |
| C1QA     | complement C1q A chain                                      | Immune related | 0.55           | 1.4E-10        |
| LILRA5   | leukocyte immunoglobulin like receptor A5                   | Immune related | 0.62           | 2.3E-10        |
| IL18BP   | interleukin 18 binding protein                              | Cytokine       | 0.73           | 3.5E-10        |
| TNF      | tumor necrosis factor                                       | Cytokine       | 0.61           | 5.4E-10        |
| HMOX1    | heme oxygenase 1                                            | Other          | 1.09           | 9.9E-10        |
| IL18R1   | interleukin 18 receptor 1                                   | Cytokine       | 0.57           | 1.3E-09        |
| ENTPD6   | ectonucleoside triphosphate diphosphohydrolase 6 (putative) | Other          | 0.45           | 2.5E-09        |
| VWA1     | von Willebrand factor A domain containing 1                 | Other          | 0.62           | 3.1E-09        |
| ESM1     | endothelial cell specific molecule 1                        | Other          | 0.73           | 3.2E-09        |
| DLL1     | delta like canonical Notch ligand 1                         | Immune related | 0.65           | 3.4E-09        |
| TNFSF13  | TNF superfamily member 13b                                  | Cytokine       | 0.72           | 3.6E-09        |
| FOLR2    | folate receptor beta                                        | Other          | 0.67           | 4.2E-09        |
| GAS6     | growth arrest specific 6                                    | Other          | 0.58           | 5.8E-09        |
| LILRB4   | leukocyte immunoglobulin like receptor B4                   | Immune related | 0.71           | 9.6E-09        |
| SEMA3F   | semaphorin 3F                                               | Other          | 0.65           | 1.0E-08        |
| SIGLEC5  | sialic acid binding Ig like lectin 5                        | Immune related | 1.50           | 1.3E-08        |
| TNFSF13  | TNF superfamily member 13                                   | Cytokine       | 0.57           | 1.8E-08        |
| TPP1     | tripeptidyl peptidase 1                                     | Other          | 0.77           | 2.2E-08        |
| ENTPD5   | ectonucleoside triphosphate diphosphohydrolase 5            | Other          | 0.42           | 2.2E-08        |
| SMOC1    | SPARC related modular calcium binding 1                     | Other          | 0.48           | 2.2E-08        |
| BST2     | bone marrow stromal cell antigen 2                          | Immune related | 0.82           | 2.5E-08        |
| FST      | follistatin                                                 | Other          | 0.70           | 3.5E-08        |
| VCAM1    | vascular cell adhesion molecule 1                           | Immune related | 0.55           | 3.6E-08        |
| VSIG4    | V-set and immunoglobulin domain containing 4                | Immune related | 0.71           | 4.1E-08        |
| CD74     | CD74 molecule                                               | Immune related | 0.58           | 5.4E-08        |
